# Supplementary material for: A dihydro-benzo[4,5]imidazo[1,2-c]quinazoline-based probe with aggregation-induced ratiometric emission for the ratiometric fluorescent detection of peroxynitrite in living cells and zebrafish
Source: Royal Society of Chemistry journal article supplement (doi:10.1039/d3ay01416a), 2023-01-01
Supplement: d3ay01416a1.pdf [file d3ay01416a1.pdf]

**Supporting information for**  
**Dihydro-benzo[4,5]imidazo[1,2-c]quinazoline-based probe with aggregation-**  
**induced ratiometric emission for the ratiometric fluorescent detection of**  
**peroxynitrite in living cells and zebrafish**

Jin-Long Yan, Shuang-Shuang Liu, Wei-Na Wu\*, Xiao-Lei Zhao, Yun-Chang Fan, Yuan Wang\*,

Zhi-Hong Xu\*

**S1 Experimental section**

*S1.1. Materials and instrumentation*

Solvents and starting materials for syntheses were purchased commercially and used as received. Elemental analyses were carried out on an Elemental Vario EL analyzer. <sup>1</sup>H NMR spectra were recorded on a Bruker AV 400MHz spectrometer in DMSO-*d*<sub>6</sub> solution. The UV spectra were recorded on a Purkinje General TU-1800 spectrophotometer. Fluorescence spectra were determined on a Varian CARY Eclipse spectrophotometer, in the measurements of emission and excitation spectra the pass width is 5 nm and the voltage of the photomultiplier tube is 650 V. ESI-MS spectra were obtained on a Bruker Daltonics Esquire 6000 mass spectrometer. The cytotoxic effect exerted by **1** on cultured HeLa cells was ascertained by a standard MTT assay according to the literature method [1]. Fluorescent images were taken on Zeiss Leica inverted epifluorescence/reflectance laser scanning confocal microscope.

*S1.2. General UV-vis and fluorescence spectra measurements*

The spectral analyses were performed in water (H<sub>2</sub>O)–dimethyl sulfoxide (DMSO) mixtures at room temperature. The concentration of the sensor **1** for UV-vis and fluorescence measurement was 10 μM. Anions and reactive oxygen species were prepared with sodium or potassium salt solution of water.

UV-vis and fluorescence spectrophotometric titrations were conducted directly in 2 mL cuvette by successive addition of corresponding chemical reagent using a microliter syringe. Upon addition of every aliquot, the solution was well mixed then the spectrum was measured.

### *SI.3. Synthesis of the probe 1*

To a solution of 3-(benzothiazol-2-yl)-2-hydroxy-5-methyl-benzaldehyde (0.538 g, 2.0 mmol) in ethanol (30 mL) was added 2-(2-aminophenyl)benzimidazole (0.272 g, 2.0 mmol). The mixture was refluxed with stirring for 2 h after which the color of the resulting solution turned pale-yellow. The precipitate was formed after the solution was cooled to room temperature, which was filtered to produce probe **1** (0.718 g, yield: 78%). Elemental analysis for **1** (C<sub>28</sub>H<sub>20</sub>N<sub>4</sub>OS) (%): Calcd: C, 73.02; H, 4.38; N, 12.17; S, 6.96. Found: C, 72.80; H, 4.58; N, 11.95; S, 6.79. <sup>1</sup>H NMR (400 MHz, DMSO-*d*<sub>6</sub>) δ: 12.89 (s, 1H, OH), 8.21-8.23 (d, 1H, ArH), 8.14-8.16 (d, 1H, ArH), 7.98-7.99 (d, 1H, ArH), 7.67-7.69 (q, 2H, ArH), 7.60-7.64 (m, 1H, ArH), 7.52-7.56 (m, 1H, ArH), 7.43 (s, 1H, CH), 7.42 (s, 1H, NH), 7.07-7.26 (m, 4H, ArH), 6.88-6.90 (d, 1H, ArH), 6.81-6.85 (t, 1H, ArH), 6.758-6.762 (d, 1H, ArH), 2.13 (s, 3H, CH<sub>3</sub>). <sup>13</sup>C NMR (101 MHz, DMSO-*d*<sub>6</sub>) δ 169.06, 147.71, 143.60, 132.86, 132.09, 129.76, 128.29, 125.10, 122.94, 122.74, 122.47, 119.15, 118.44, 117.12, 115.20, 111.77, 110.60, 63.57, 40.65, 40.44, 40.23, 40.02, 39.81, 39.60, 39.39, 20.50. ESI-MS (m/z): (C<sub>34</sub>H<sub>27</sub>N<sub>2</sub>O<sub>3</sub>S<sup>+</sup>), Calcd: 461.1391. Found: 461.1437.

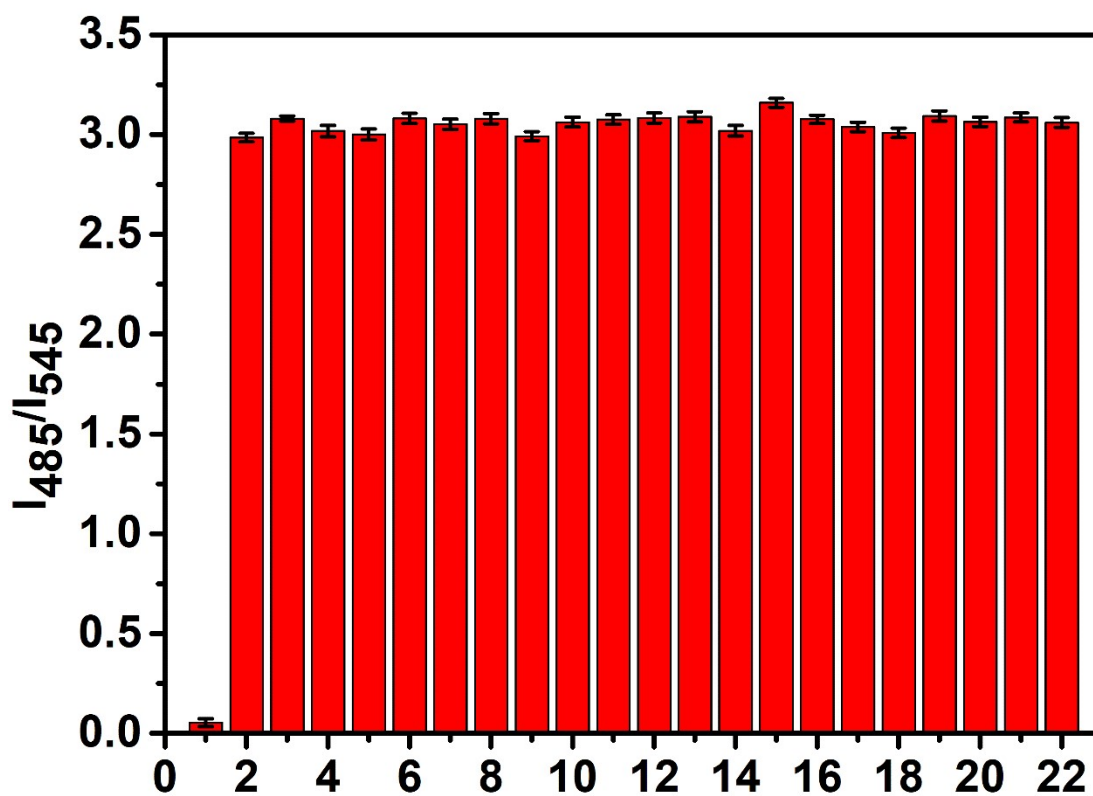

Fig. S1 Fluorescent intensity ratio ( $I_{485}/I_{545}$ ) of **1** (10  $\mu\text{M}$ ) and **1**+ $\text{ONOO}^-$  (8.5  $\mu\text{M}$ ) with various interfering analytes (100  $\mu\text{M}$ ) in PBS buffer (20 mM, pH 7.4, 0.5% DMSO). **1**. Probe; 2-21, **1**+ $\text{ONOO}^-$  with analytes: 2.  $\text{AcO}^-$ , 3.  $\text{Br}^-$ , 4.  $\text{Cl}^-$ , 5.  $\text{ClO}_4^-$ , 6.  $\text{SO}_4^{2-}$ , 7.  $\text{HSO}_4^-$ , 8.  $\text{F}^-$ , 9.  $\text{H}_2\text{PO}_4^-$ , 10.  $\text{HPO}_4^-$ , 11.  $\text{I}^-$ , 12.  $\text{PO}_4^{3-}$ , 13.  $\text{S}^{2-}$ , 14.  $\text{HSO}_3^-$ , 15.  $\text{SO}_3^{2-}$ , 16.  $\text{ClO}^-$ , 17.  $\text{H}_2\text{O}_2$ , 18.  $^1\text{O}_2$ , 19.  $\cdot\text{OH}$ , 20.  $\text{NO}$ , 21.  $\text{ROO}^-$ ; 22. **1**+ $\text{ONOO}^-$ . The excitation wavelength was 360 nm.

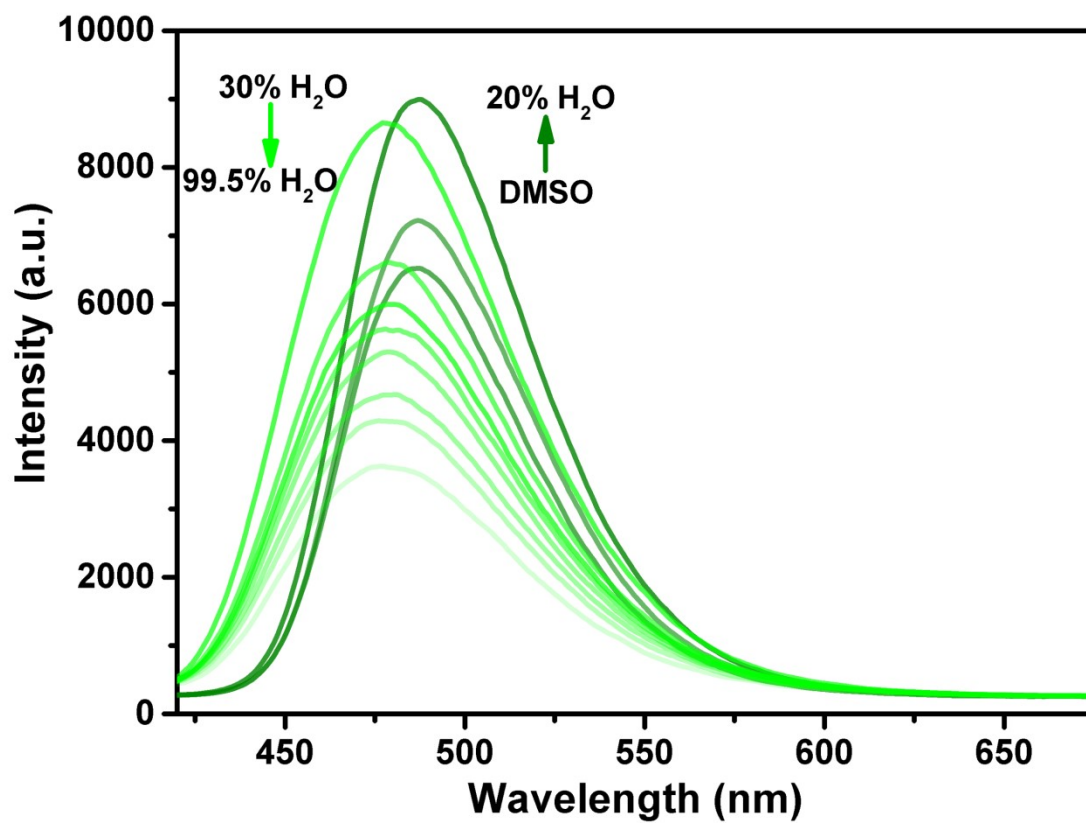

Fig. S2 Fluorescence spectra of **1** (10  $\mu$ M)+ONOO<sup>-</sup> (8.5  $\mu$ M) in H<sub>2</sub>O/DMSO mixtures with different water fractions. Excitation wavelength was 360 nm.

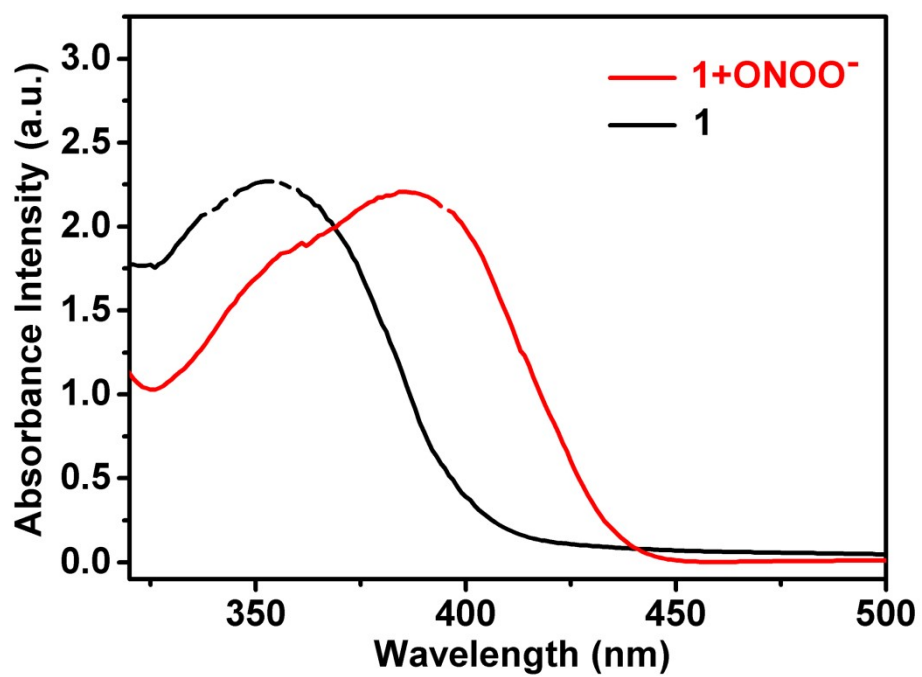

**Fig. S3** UV-vis spectra of **1** (10  $\mu\text{M}$ ) and **1**+ONOO<sup>-</sup> (8.5  $\mu\text{M}$ ) in PBS buffer (20 mM, pH 7.4, 0.5% DMSO).

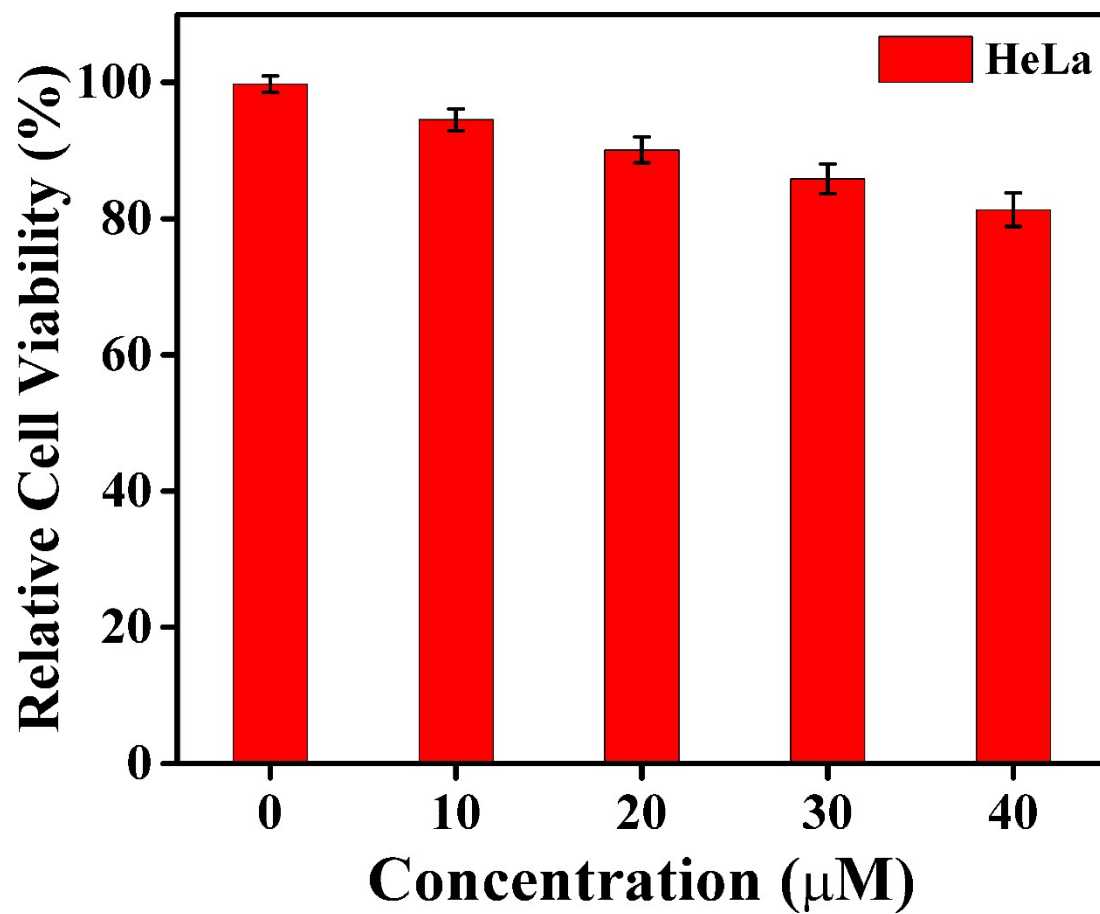

Fig. S4 The viability assay of cell with different concentration of 1 (0-40 μM) on HeLa cells using the MTT assay for 24 h. All samples were done in triplicate.

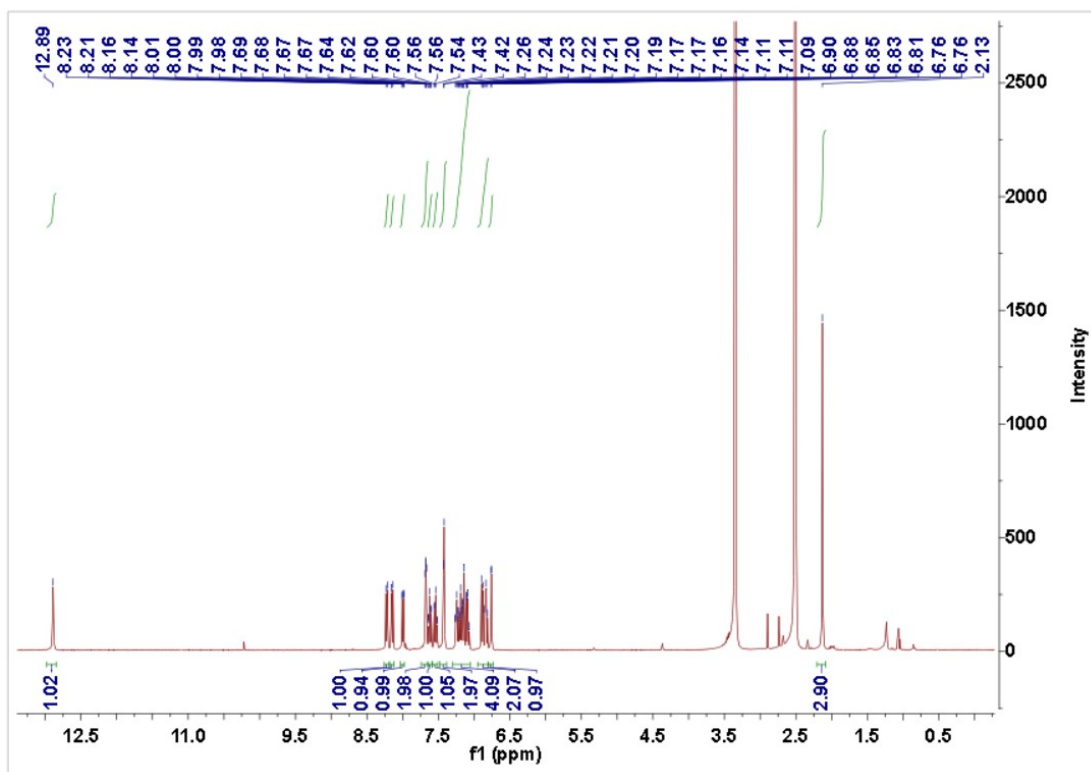

Fig. S5  $^1\text{H}$  NMR spectrum of **1** in  $\text{DMSO-}d_6$ .

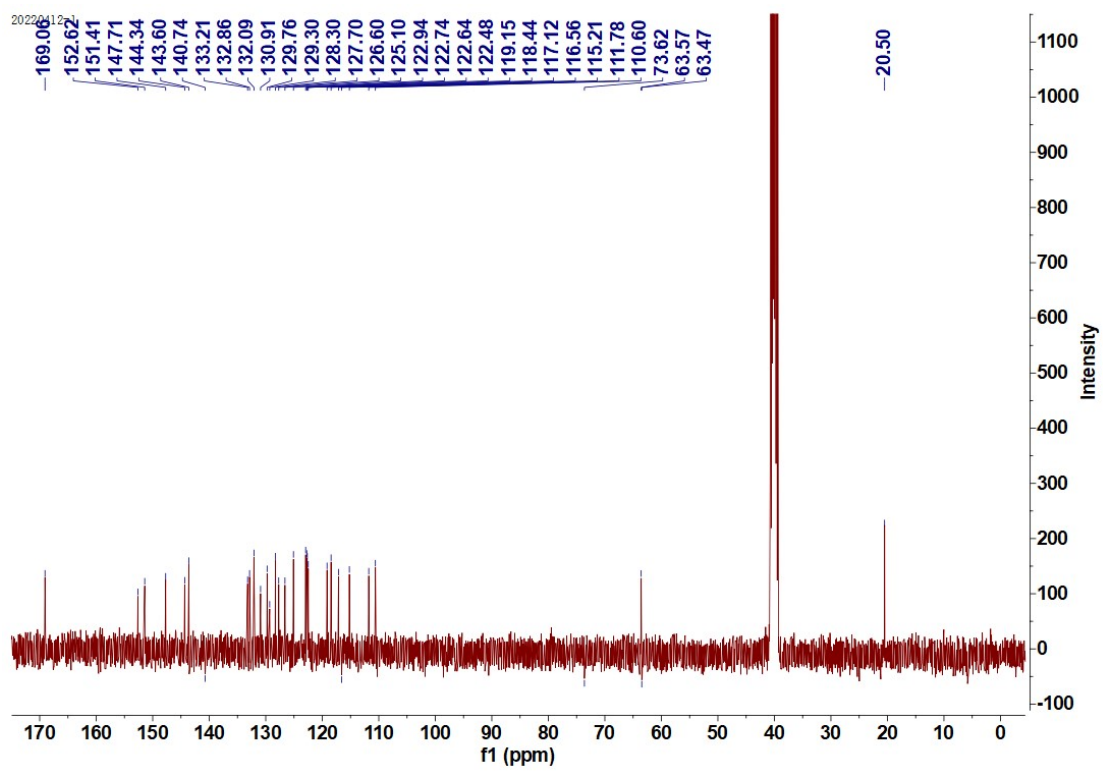

Fig. S6  $^{13}\text{C}$  NMR spectrum of **1** in  $\text{DMSO-}d_6$ .



**Table S1** Comparison of probe **1** with some reported ONOO<sup>-</sup> probes.

| Ref.      | Probe                                                                               | Media     | LOD (nM) | pH       | Response Time |
|-----------|-------------------------------------------------------------------------------------|-----------|----------|----------|---------------|
| [2]       | 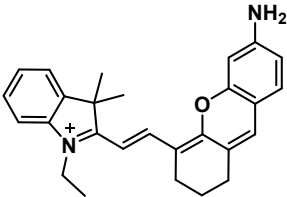   | PBS       | 33       | 7.0-12.0 | 120 s         |
| [3]       |    | 1% DMSO   | 75       | 7.0-12.0 | 60 s          |
| [4]       |   | 10% DMSO  | 78.7     | 6.5-8.5  | 1 h           |
| [5]       |  | 30% DMSO  | 53       | 3.0-10.0 | 20 min        |
| [6]       |  | 10% DMF   | 69       | -        | 100 s         |
| [7]       |  | 10% DMF   | 135      | 4.0-9.0  | 5 min         |
| This work |  | 0.5% DMSO | 17.6     | 2.0-13.0 | 30 s          |

## References

- [1] J. Zhang, J. F. Kan, Y. Y. Sun, M. Won, J. H. Kim, W. F. Zhang, J. Zhou, Z. S. Qian, J. S. Kim, *ACS. Appl. Bio. Mater.* 4 (2021) 2080-2088.
- [2] D. Y. Zhou, J. Ou-Yang, Y. F. Li, W. L. Jiang, Y. Tian, Z. M. Yi, C. Y. Li, *Dyes. Pigm.* 161 (2018) 288-295.
- [3] M. L. Li, H. Han, S. M. Song, S. M. Shuang, C. Dong, *Spectrochim. Acta. A.* 261 (2021) 120044.
- [4] Y. B. Zhang, D. G. Ma, *Spectrochim. Acta. A.* 244 (2021) 118890.
- [5] B. Gu, C. F. Liu, Y. Wu, C. X. Zhang, Y. M. Shen, M. Q. Liu, *ACS Omega.* 5 (2020) 27530-27535.
- [6] W. L. Sheng, K. Wang, N. Gao, L. Z. Wang, R. C. Wang, X. M. Zhang, X. Q. Chen, Y. Zhang, B. C. Zhu, K. C. Liu, *Analyst.* 146 (2021) 5264-5270.
- [7] C. Wang, W. Shu, Q. Q. Chen, C. L. Yang, S. Su, M. X. Gao, R. B. Zhang, J. Jing, X. L. Zhang, *Spectrochim. Acta. A.* 260 (2021) 119990.
